# Supplementary material for: Rapid response to anthropogenic climate change by Thuja occidentalis: implications for past climate reconstructions and future climate predictions
Source: PeerJ. 2019 Jul 26;7:e7378. doi: 10.7717/peerj.7378 (PMC6662565; doi:10.7717/peerj.7378)
Supplement: Supplemental Information 8 — *Direct Mauna Loa measurements (NOAA ESRL Global Monitoring Division (2016). **White et al. (2015)) and Petit et al. (2001) ice core records. ***: for United States Climate Data: PRISM Climate Group Oregon State University. (2017). Data Explorer: Time Series Values for Individual Locations. Retrieved from Northwest Alliance for Computational Science & Engineering database. For Canadian Climate Data: Government of Canada (Ed.). (2018, January 11). All specimens used for isotope analysis are stored in the University of Michigan’s Earth Systems Laboratory (Dr. Nathan Sheldon & Dr. Ingrid Hendy) within the University of Michigan Earth and Environmental Science Department. [file peerj-07-7378-s008.xlsx]

## Sheet: Data
Supporting Information Table S3: All collected data.*Direct Mauna Loa measurements (NOAA ESRL Global Monitoring Division (2016) **White et al. (2015)) and Petit et al. (2001) ice core records. ***: for United States Climate Data: PRISM Climate Group Oregon State University. (2017). Data Explorer: Time Series Values for Individual Locations. Retrieved from Northwest Alliance for Computational Scie…
RAS ID #	Year	Collector	Original tree location	Source	Accession #	Date collected	[CO2](ppm)*,**	δ13Catm (‰)*,**	Latitude (°N)	Longitude (°W)	MAP (mm yr-1) ***	MAT (°C) ***	Mean Max T (°C) ***	Elevation (m)	%N	%C	C:N (molar)	C:N (weight %)	δ13Cleaf (‰)	Δleaf (‰, calculated using Feng et al. 1999)
18	2014	C. Mervenne	Hidden Lakes Garden	HLG	18	2014-08-25	395.43	-8.351	42.0291	-84.1121	823.722	8.9444	26.5	94.5	1.4325	48.0475	39.1149	33.6638	-26.9725	19.1377
19	2014	C. Mervenne	Hidden Lakes Garden	HLG	19	2014-08-25	395.43	-8.351	42.0295	-84.1124	823.722	8.9444	26.5	94.5	1.362	50.59	43.3165	37.1439	-26.5149	18.6587
20	2014	C. Mervenne	Hidden Lakes Garden	HLG	20	2014-09-05	395.43	-8.351	42.0291	-84.1128	823.722	8.9444	26.5	94.5	1.42	48.1	39.5023	33.8732	-26.3443	18.4801
64	2014	C. Mervenne	Hidden Lakes Garden	HLG	64	2014-11-01	395.43	-8.351	42.026	-84.1148	823.722	8.9444	26.5	94.5	1.655	50.95	35.9015	30.7855	-27.8211	20.0272
118	2014	C. Mervenne	Hidden Lakes Garden	HLG	118	2014-09-24	395.43	-8.351	42.0286	-84.1126	823.722	8.9444	26.5		1.653	49.93	35.2253	30.2057	n/a	n/a
141	2014	C. Mervenne	Hidden Lakes Garden	HLG	141	2014-08-25	395.43	-8.351	42.0296	-84.1123	823.722	8.9444	26.5		1.16	49.87	50.1357	42.9914	n/a	n/a
163	2014	C. Mervenne	Hidden Lakes Garden	HLG	163	2014-08-25	395.43	-8.351	42.0292	-84.1121	823.722	8.9444	26.5	94.5	1.385	49.17	41.4015	35.5018	-25.9945	18.1143
164	2014	C. Mervenne	Hidden Lakes Garden	HLG	164	2014-08-25	395.43	-8.351	42.0286	-84.1121	823.722	8.9444	26.5	94.5	1.39333	49.7133	41.6087	35.6794	-26.3609	18.4975
171	1838	Samples, John	Champaign County, Urbana, Ohio	MICH	S.N	3/24/1838	284.6	-6.62	40.1084	-83.7524	1059.9	10.5	30.7	97.5	1.05	48.61	53.9886	46.2952	-24.215	18.0317
172	1892	S. R. and D. R. Camp	Topinabee, Michigan	MICH	#576	7/21/1892	294	-6.66	45.48	-84.59	432.5	6.25	27	54.6	1.27	50.54	46.4085	39.7953	-26.2351	20.1024
173	1894	Mrs. James Buchanan	Lowell, Kent County, Michigan	MICH	#51233	4/03/1894	295.1	-6.6	42.94	-85.35	972	9.5	29.1	59.7	1.59	51.13	37.5012	32.1572	-24.9863	18.8575
174	1895	Fyfe, Livingston, Shaddick, Skeels	Grand Rapids, Michigan	MICH	#42440	7/21/1895	295.5	-6.6	42.96	-85.66	615.95	6.44	29.5	63.7	1.49	55.54	43.4696	37.2752	-23.7217	17.5377
175	1907	Frank C Gates	Mt. Hope Cemetery, Urbana, Illinois	MICH	#1313	1907-03-23	300.7	-6.66	40.1001	-88.2266	1036.02	10.2222	29.7	231	1.54	52.79	39.9758	34.2792	-24.2243	18.0003
176	1908	Bartlett	Mt. Madison, New Hampshire	MICH	#1257	1908-04-24	300.7	-6.59	44.3284	-71.2779	1327.66	1.38889	20.4	1617	1.26	50.48	46.7213	40.0635	-23.9002	17.7341
177	1916	L M Umbach	Portage, Michigan	MICH	#8299	1916-07-31	298.8	-6.868	42.23	-85.58	904.494	8.77778	32.9	260	1.18	53.4571	52.831	45.3026	-25.0284	18.6266
178	1924	Erlanson	Petoskey, Michigan	MICH	#426	1924-07-18	303.9	-6.77	45.37	-84.97	791.972	5.3333	23.6	207	0.86	51.84	70.2963	60.2791	-24.7501	18.4364
179	1924	Erlanson	Scotty Bay, Clark Township, Mackinac County, Michigan	MICH	#680	1924-08-30	303.9	-6.77	45.98	-84.19	723.9	4.111	23.1	187	0.96	52.06	63.241	54.2292	-25.1328	18.8362
180	1926	Lyon Jr.	Mineral Springs, Indiana	MICH	MICH#1491323	1926-08-18	305	-6.74	41.3262	-85.7442	896.112	8.4444	29.5	258	0.72	52.63	85.2446	73.0972	-25.3604	19.1049
181	1929	Unknown	Gulliver Lake, Doyle Township, Michigan	MICH	S.N.	1929-08-24	306.2	-6.77	45.99	-86.03	781.558	3.8889	23.2		1.29	49.2	44.4776	38.1395	n/a	n/a
182	1930	Marcus W Lyon, Jr.	Stevensville, Michigan	MICH	MICH#1244469	1930-07-17	306.6	-6.76	42.013	-86.52	574.294	10.0555	28.5	183	1.24	50.93	47.8981	41.0726	-26.6268	20.4103
183	1931	Grassl	Chene Island, Algoma, Ontario	MICH	MICH#1491259	1931-07-04	307	-6.75	46.5022	-84.5501	852	4.8		183	1.16	53.09	53.3729	45.7672	-24.3132	18.0008
184	1931	Carl O. Grassl	Siskiwat Bay Isle Royale, Michigan	MICH	#1161	1931-08-25	307	-6.75	47.95	-88.76	656.59	5.7778	23.3	183	1.85	50.42	31.7832	27.2541	-23.8105	17.4767
185	1932	Sister M. Vincent de Paul McGivney	Harbor Beach, Michigan	MICH	MICH#1247725	1932-10-01	307.3	-6.74	43.84	-82.65	787.4	3.5	27.3	181	1.15	54.76	55.5305	47.6174	-24.5395	18.2473
186	1933	Carl O Grassl	Michigan	MICH	#3062	1932-10-01	307.3	-6.74	n/a	n/a	n/a	n/a	n/a	n/a	1.05	49.22	54.6661	46.8762	-24.8337	18.5545
187	1936	Cormack & Baldwin	Ontario	MICH	MICH#1491290	1936-08-04	307.7	-6.83	n/a	n/a	n/a	n/a	n/a	n/a	1.22	46.35	44.3053	37.9918	-24.5495	18.1655
188	1936	Grassl	Pardee Township, Ontario	MICH	#7585	1936-09-16	307.7	-6.83	48.0834	-89.6334	1025	-1		323	1.39	49.97	41.9238	35.9496	-23.7168	17.297
189	1937	F J Hermann	Michigan	MICH	#9256	1937-09-13	309.2	-6.81	n/a	n/a	n/a	n/a	n/a	n/a	1.11	51.24	53.8334	46.1622	-24.9434	18.5973
190	1938	Chester C Cook	Belgium, Wisconsin	MICH	MICH#1491303	1938-07-27	310.3	-6.8	43.4997	-87.8504	928.116	9.05556	28.4	224	1.67	51.87	36.2214	31.0599	-23.7687	17.3818
191	1938	Chester C Cook	Wisconsin	MICH	#C-142	1938-08-16	310.3	-6.8	n/a	n/a	n/a	n/a	n/a	n/a	0.98	49.07	58.3923	50.0714	-24.735	18.3899
192	1939	Harold Neumann	Menominee Indian Reservation, Keshena, Wisconsin	MICH	#C-1525	1939-12-14	309	-6.88	45.0025	-88.6668	568.706	9.1111	29.8	284	1.28	51.38	46.8112	40.1406	-26.0674	19.7009
193	1940	Cook	Wilson, Wisconsin	MICH	#K-162	1940-08-12	310.5	-6.78	43.6829	-87.7665	795.02	7.333	27.2	210	1.29	50.91	46.0235	39.4651	-25.7442	19.4654
194	1941	M N Zinck	Goulbourn Township, Ottawa	MICH	MICH#1491265	1941-07-03	310.8	-6.79	45.235	-75.904	868	6		115	1.07	50.47	55.0067	47.1682	-24.6014	18.2606
195	1942	Harold and Virginia Bailey	Mott Island, Isle Royale National Park	MICH	#4306	1942-07-16	311	-6.79	48.0892	-88.579	777.24	3.88889	20.4	190	1.39	49.94	41.8986	35.9281	-25.2687	18.9577
196	1946	H H Bartlett	Waterloo, Jackson County, Michigan	MICH	#21453	1946-07-13	310.8	-6.86	42.18	-84.35	668.02	10.1667	29.9	293	1.79	49.9	32.5097	27.8771	-24.5431	18.128
197	1948	Chase	Starved Rock State Park, Illinois	MICH	#I0I67	1948-09-19	309.7	-6.89	41.3198	-88.9934	812.292	9	30.5	176	2.05	48.28	27.465	23.5512	-25.7621	19.3711
198	1950	Yves Desmarais	Quebec	MICH	#1029	1950-07-28	311.2	-6.87							1.46	51.94	41.4873	35.5753	-23.8598	17.4051
199	1952	Virginius H Chase	Pentwater, Michigan	MICH	#12669	1952-06-28	311.5	-6.86	43.78	-86.43	801.624	8.8333	31.6	184	1.65	47.62	33.6567	28.8606	-24.0165	17.5787
200	1952	E G Voss	Hume Township, Michigan	MICH	#1201	1952-06-28	311.5	-6.86	43.98	-83.06	726.948	8.4444	29	180	1.55	50.39	37.9122	32.5097	-25.9359	19.5839
201	1954	Jennie V A Dieterle	Traverse City Michigan	MICH	#1304	1954-08-25	312.8	-6.87	44.76	-85.62	778.002	7.66667	26	185	1.5	48.07	37.3722	32.0467	-25.2174	18.8221
202	1957	E G Voss	Beaver Island, Michigan	MICH	#3872	1957-05-25	314.7	-6.89	45.65	-85.55	756.92	6.2222	27.1	183	1.16	48.98	49.241	42.2241	-27.8594	21.5703
203	1957	P A Hyypio	Limestone Mountain, Michigan	MICH	MICH#1244477	1957-06-13	314.7	-6.89	46.81	-88.7	687.832	5.2222	27.1	296	1.25	48.48	45.2292	38.784	-27.4916	21.1839
204	1959	Heidenreich	Lake Simcoe, Ontario	MICH	MICH#1491296	1959-07-06	315.7	-6.92	44.4636	-79.3353	885	4.4		295	1.4	47.58	39.6335	33.9857	-24.3622	17.8778
205	1960	Voss	Cadillac, Michigan	MICH	#9456	1960-05-15	316.1	-6.93	44.25	-85.4	775.208	5.77778	25.3	398	1.48	48.89	38.5234	33.0338	-24.5311	18.0437
206	1961	E. G. Voss	South Manitou Island, Leelanau County, Michigan	MICH	#9876	1961-06-10	316.7	-6.95	45.02	-86.13	757.174	7.4444	25.2	182	1.74	48.65	32.6062	27.9598	-23.9763	17.4446
207	1962	Voss	Michigan	MICH	#10998	1962-07-18	319.2	-6.96	n/a	n/a	n/a	n/a	n/a	n/a	1.26	49.46	45.7772	39.254	-25.2848	18.8001
208	1962	A Walther, A Auclair	Otter Lake, Quebec	MICH	#1491269	1962-09-23	319.2	-6.96	45.8489	-76.4297	885	4.4	n/a	210	1.22	49.21	47.0392	40.3361	-25.0054	18.5082
209	1965	Brunekt	Michigan	MICH	#578	1965-06-19	319.3	-7.02	n/a	n/a	n/a	n/a	n/a	n/a	1.14	47.48	48.5704	41.6491	-26.2282	19.7256
210	1968	D. J. Hagenah	Michigan	MICH	#6720	1968-06-02	316.8	-7.07	n/a	n/a	n/a	n/a	n/a	n/a	0.88	45.18	59.8728	51.3409	-26.1459	19.588
211	1968	T. Reznicek	Ontario	MICH	#134	1968-03-13	316.8	-7.07	n/a	n/a	n/a	n/a	n/a	n/a	1.37	48.84	41.5739	35.6496	-24.1667	17.5201
212	1968	Stuckey	Ohio	MICH	#6356	1968-03-31	316.8	-7.07	n/a	n/a	n/a	n/a	n/a	n/a	1.14	47.36	48.4477	41.5439	-25.0132	18.4035
213	1968	E. G. Voss	St. Helena Island, Moran, Michigan	MICH	#12816	1968-08-31	316.8	-7.07	45.86	-84.87	845.82	6.16667	23.8	242	0.78	48.61	72.677	62.3205	-26.7765	20.2487
214	1970	Merkle	Tom Creek, Clare County Michigan	MICH	#70-432	1970-10-18	325	-7.01	43.56	-85	843.788	6.22222	28.2	302	1.06	49	53.9084	46.2264	-24.7882	18.2301
215	1970	Voss	Thunder Bay Island, Michigan	MICH	#13224	1970-06-24	325	-7.01	45.04	-83.2	843.788	6.4444	28.2	215	0.82	48.08	68.378	58.6341	-24.2641	17.6831
216	1971	C. E. Garton	Algoma District, Ontario	MICH	#14627	1971-07-29	323.9	-7.21	47.6459	-84.7952	852	4.8	n/a	516	0.96	48.46	58.8678	50.4792	-24.6979	17.9307
217	1972	E. G. Voss	Middle Island, Alpena County, Michigan	MICH	#13980	1972-07-14	327.9	-7.21	45.19	-83.33	759	5.2777	27.5	215	1.36	49.69	42.6085	36.5368	-22.316	15.4508
218	1973	R. Kral	Pickett State Park, Tennessee	MICH	#49852	1973-05-05	327.9	-7.21	36.55	-84.8	1723.39	13.3333	28.3	392	0.68	46.52	79.7805	68.4118	-27.5879	20.956
219	1975	J H Soper and L R Williams	Algoma District, Ontario	MICH	#1491299	1975-08-26	329.39	-7.32	47.6459	-84.7952	852	4.8	n/a	516	1.24	49.18	46.2522	39.6613	-25.8788	19.0518
220	1976	J K Morton and Joan M Venn	Caribou Island, Lake Superior, Ontario	MICH	#NA 9782	1976-08-29	329.78	-7.42	47.3579	-85.809	708	7.83333	n/a	516	1.08	47.86	51.6791	44.3148	-22.9958	15.9424
221	1980	A A Reznicek, P M Catling	Ontario	MICH	#5486	1980-05-25	336.2	-7.43	n/a	n/a	n/a	n/a	n/a	n/a	n/a	n/a	n/a	n/a	-24.9861	18.006
222	1983	M J Schepanek, A Dugal	Minnehaha Lake, Ontario	MICH	#5469	1983-08-13	340.84	-7.66	45.8425	-78.725	1061.53	6.8333	n/a	396	1.16	50.59	50.8596	43.6121	-25.2602	18.0563
223	1985	B J Madsen	Shingleton Fed, Schoolcraft County, Michigan	MICH	#MH1244511	1985-07-21	343.5	-7.64	46.3483	-86.4702	983.234	4.88889	24.6	252	0.86	48.58	65.8757	56.4884	-25.5916	18.423
224	1985	Brian T Hazlett	Otter Creek, Michigan	MICH	#3504	1985-07-22	343.5	-7.64	44.75	-86.06	1090.42	7.333	24.6		1.12	50.23	52.3011	44.8482	-25.7221	18.5595
225	1988	Robert W Smith	Rome Township, Michigan	MICH	#2418	1988-05-04	348.5	-7.77	41.95	-84.21	762	8.8333	31.3	299	1.1	44.07	46.7215	40.0636	-26.5686	19.3117
226	1988	Robert W. Smith	Cambridge Township, Michigan	MICH	#2433	1988-05-11	348.5	-7.77	42.03	-84.21	760.476	8.8333	31.4	305	0.89	53.8427	70.5509	60.4974	-26.7704	19.523
227	1989	W. W. Brodowicz	Byron, Kent Co., Michigan	MICH	#602	1989-09-28	350.8	-7.72	42.8	-85.71	802.64	7.55556	28.1	211	1.56	31.4038	23.476	20.1307	-24.5903	17.2956
228	1993	Naczi, Reznicek & Wieboldt	Scott County, Virginia	MICH	#3169	1993-06-21	354.9	-7.75	36.6816	-82.6051	1077.98	7.9444	32.6	530	1.02	48.951	55.9664	47.9912	-27.0641	19.8514
229	1993	Phyllis J Higman, Thomas D Trana	Michigan	MICH	#181	1993-06-10	354.9	-7.75							1.43	34.3497	28.0125	24.0207	-25.7603	18.4865
230	1998	Timothy L Walters, John Guidinger	Norman Township, Michigan	MICH	#1244446	1998-06-03	363.11	-7.94	44.21	-85.89	825.246	9.44	28	212	1	47.28	55.137	47.28	-27.0189	19.6087
231	2003	Abbie Gosselink	YMCA Camp Manitou-Lin on Lake Barlow, Grand Rapids	MICH	#84	2003-06-09	372.79	-8.08	42.67	-85.51	888.492	8.38889	28.3	238	1.2	39.0417	37.9414	32.5347	-28.3015	20.8105
232	2007	Timoth L Walters, Joel Schaeffer	Whitewater Township, Grand Traverse County, Michigan	MICH	#11883	2007-05-16	380.49	-8.17	44.77	-85.4	658.876	7.88889	26.4	214	0.79	61.443	90.7009	77.776	-28.5088	20.9356
233	2008	Thomas G Lammers	Menominee County, Escanaba River State Forest, Michigan	MICH	#12004	2008-08-11	382.31	-8.2	45.52	-87.4	700.786	5.27778	26.6	182	0.9	57.7889	74.8803	64.2099	-25.9022	18.1729
234	2009	David C Dister	Ludington State Park, Mason County, Michigan	MICH	#291	2009-09-27	383.84	-8.21	44.03	-86.51	917.19	7	21.6	204	0.81	30.5556	43.9917	37.7229	-25.6527	17.9019
235	2012	Thomas G Lammers, Diane L Lammers	Kalamazoo County	MICH	#13782	2012-06-27	389.46	-8.26	42.23	-85.52	760.22	11.22	32.8	261	1.41	35.3901	29.2704	25.0993	-26.3468	18.5763
296	1804		Castillo et Maldonado lectae, New Spain, Cuba	F		12/8/1804	283.4	-6.43	21.3721	-77.852	1333.5	25		120	1.81	48.65	31.3451	26.8785	-22.3096	16.242
297	1873	H H Babcock	Thousand Islands, Watersmeet Township, Michigan	F	FM#90481	7/25/1873	289.1	-6.66	46.2213	-89.4	662.47	3.7	25.4	520	0.85	50.87	69.7925	59.8471	-23.8078	17.5661
298	1892	Small		F	S.N.	7/23/1892	294	-6.66	n/a	n/a	n/a	n/a	n/a	n/a	0.55	47.4	100.504	86.1818	-24.7646	18.5643
299	1896	M C Jensan	Lake Forest, Illinois	F	#56	1905-03-10	296.9	-6.78	42.2533	-87.8339	715.01	5.05556	26.8	n/a	1.21	48.67	46.9075	40.2231	-24.3524	18.011
300	1900	Lansing	Clarke, Indiana	F	#876	1900-06-04	295.9	-6.78	38.4098	-84.7051	1437.64	3.80555	33.2	n/a	0.62	46.71	87.8586	75.3387	-24.6231	18.2936
301	1900	C Baenitz	Breslau, Wroclaw, Poland	F	S.N.	1900-05-09	295.9	-6.78	51.1354	17.0646	590	8.3	n/a	n/a	0.87	47.97	64.3008	55.1379	-25.0191	18.7072
302	1900	C Baenitz	Germany	F	S.N.	1900-05-16	295.9	-6.79	n/a	n/a	n/a	n/a	n/a	n/a	1.45	48.08	38.669	33.1586	-21.9843	15.5359
303	1902	Chas. J. Brand	Bemidji, Minnesota	F	#679	1902-06-01	296.4	-6.59	47.4806	-94.8842	603.758	4.44444	27.9	417	0.88	48.18	63.8484	54.75	-24.2736	18.1235
304	1908	Smith	Missouri	F	#623	1908-05-25	300.7	-6.8							1.87	50.15	31.2749	26.8182	-25.9722	19.6834
305	1918	C F Millspaugh	Ephraim, Wisconsin	F	#4244	1918-07-12	302.6	-6.74	45.1533	-87.1667	1079.5	-1.8883	24.7	213	1.44	48.56	39.3262	33.7222	-25.0285	18.7579
306	1926	J Francis Macbride	Trout Park, Elgin, Illinois	F	#703b	1926-08-30	305	-6.76	42.0643	-88.2674	959.866	8.4444	28.5	242	1.8	49.58	32.1218	27.5444	-23.6375	17.2861
307	1930	F J Hermann	Lebanon Township, Michigan	F	#2315	1930-07-19	306.6	-6.83	43.0711	-84.7537	506.476	9.111	29.9	196	1.66	52.38	36.7979	31.5542	-24.54	18.1555
308	1936	Tryon, Jr.	Mineral Springs, Porter County, Indiana	F	#3088	1936-07-02	307.7	-6.83	41.6334	-87.0834	820.674	9.8333	32.4	205	2.09	48.22	26.9059	23.0718	-25.3236	18.974
309	1936	Olga Lakela	Duluth, Minnesota	F	#1701	1936-08-12	307.7	-6.83	46.7637	-92.1332	611.886	3.27778	27	196	1.75	48.25	32.1533	27.5714	-24.3718	17.98
310	1936	Ray C Fiesner	Waldo County, Maine	F	#10162	1936-08-22	307.7	-6.8	44.5072	-69.0191	1358.9	6.88889	25.1	61	1.29	48.6	43.9352	37.6744	-26.223	19.946
311	1938	Auray Blain	Sante-Iren, canton Nemtaye, Matapedia Quebec	F	#185	1938-07-17	310.3	-6.83	47.9704	-66.9548	1038	2.2	n/a	57	1.49	47.67	37.31	31.9933	-25.8896	19.5661
312	1940	Marie-Victorin, Boivin, Raymond, Kucyniak	Reviere la Martre, Fort Smith, Northwest Territories	F	#3825	1940-08-18	310.5	-6.78	63.1729	-116.807	288.6	-4.3	n/a	157	1.93	46.99	28.3932	24.3472	-26.79	20.5608
313	1944	Benke	Wisconsin	F	#6364	1944-09-14	309.5	-6.84	n/a	n/a	n/a	n/a	n/a	n/a	n/a	n/a	n/a	n/a	-23.9165	17.4949
314	1945		Par Valle Teguci, Tegucigalpa, Honduras	F		1945-12-27	309.5	-6.85	14.081	-87.2002	1002	22.3	n/a	n/a	2.09	48.06	26.8166	22.9952	-25.6912	19.338
315	1949	Julian A Steyermark	Trout Park, Elgin, Illinois	F	#68345	1949-06-29	309.7	-6.88	42.0643	-88.2674	843.534	9.72222	30.7	242	1.76	48.37	32.0501	27.483	-23.8783	17.4141
316	1952	Floyd A Swink	Warren Dunes State Park, Sawyer, Michigan	F	#838	1952-04-26	311.5	-6.86	41.9151	-86.5893	783.336	10.1667	29.5	199	1.61	50.72	36.7383	31.5031	-24.0636	17.6278
317	1953	Swink	Kenosha County, Wisconsin	F	#2310	1953-07-26	312.7	-6.85	42.5737	-87.8351	640.842	9.77778	29.4	190	1.61	48	34.7681	29.8137	-25.1	18.7198
318	1980	M Nee	Jefferson County, Missouri	F	#19081	1980-07-21	336.2	-7.43	43.027	-88.798	768.604	12.8889	30.3	257	1.98	49.03	28.8777	24.7626	-25.1151	18.1407
319	1999	Hess, Leidner, Allen, Stoynoff, Bolger	Waldo County, Maine	F	#8818	1999-07-15	365.48	-7.97	44.5072	-69.0191	1189.23	8.5	27.4	61	n/a	n/a	n/a	n/a	-25.4484	17.9349
320	1999	Hess, Leidner, Allen, Stoynoff, Bolger	Lisle, IL	F	unk	1999-06-21	365.48	-7.97	41.7991	-88.0751	943.864	11.22	32.5	204	2.02	49.05	28.3174	24.2822	-25.0798	17.55
321	No date	Unknown	San Jose, Costa Rica	F	S.N.	No date	Unknown	Unknown	9.9329	-84.1197	1901	20.4	n/a	n/a	1.28	51.01	46.4741	39.8516	-26.7006	n/a
322	No date	Unknown	Tres Rios, Costa Rica	F	S.N.	No date	Unknown	Unknown	9.90688	-83.9842	2031	19.2	n/a	n/a	1.5	48.41	37.6365	32.2733	-25.5086	n/a
323	No date	Unknown	Pacayas, Costa Rica	F	S.N.	No date	Unknown	Unknown	9.91303	-83.8089	3002	19.2	n/a	n/a	2.17	47.55	25.5539	21.9124	-28.5	n/a
324	No date	Unknown	Volcan Irazu, Costa Rica	F	S.N.	No date	Unknown	Unknown	9.97979	-83.349	3422.94	16.25	17.184	n/a	1.36	48.78	41.8282	35.8676	-24.6134	n/a
347	1857	Unknown	New Haven, CT	Y	#6B	1857	286.7	-6.53	41.3138	-72.9212	1078.01	10	27.5	10	n/a	n/a	n/a	n/a	-23.4056	n/a
348	1879	George H. Leland	Newport, VT	Y	YU#025477	July 1879	290.3	-6.42	44.9379	-72.2004	853.31	5.7	26.4	217	n/a	n/a	n/a	n/a	-24.5498	18.5861
349	1887	J H Schuette	Brown County, Wisconsin	Y	#282	8/2/1887	292.3	-6.42	44.5273	-87.9932	499.3	6	26.2	178	n/a	n/a	n/a	n/a	-25.4662	19.5439
350	1891	Anna E Carpenter	Norwalk, Connecticut	Y	#652	5/17/1891	293.6	-6.61	41.119	-73.4214	968.89	9	27	13	n/a	n/a	n/a	n/a	-22.6159	16.3762
351	1892	John K Small	Mouth of Hungry's Mother Creek, Smyth County, W. Virginia	Y	YU#025487	7/4/1892	294	-6.66	36.8886	-81.5215	967.99	10.5	27	699	n/a	n/a	n/a	n/a	-23.3388	17.0774
352	1899	Emile F Williams	Middlesex Fells Reservation, Massachusetts	Y	#2270	4/9/1899	295.8	-6.77	42.4553	-71.0914	1005.33	9.38889	n/a	51	n/a	n/a	n/a	n/a	-22.6128	16.2094
353	1899	Emile F Williams	Mt. Desert, Maine	Y	#2269	7/18/1899	295.8	-6.77	44.3478	-68.335	1087.63	6.8333	n/a	21	n/a	n/a	n/a	n/a	-21.9152	15.4845
354	1901	Nellie E Flynn	Burlington, Connecticut	Y	S.N.	1901-05-17	296.2	-6.79	41.7655	-72.9532	1652.78	8.27778	n/a	254	n/a	n/a	n/a	n/a	-25.0531	18.7324
355	1902	Nellie E Flynn	Burlington, Connecticut	Y	YU#025491	1902-04-25	296.4	-6.79	41.7655	-72.9532	1459.48	8.333	n/a	254	n/a	n/a	n/a	n/a	-24.1489	17.7884
356	1902	C K Averill	Canaan, Connecticut	Y	#417	1902-08-31	294.8	-6.79	41.9663	-73.3124	1343.67	7.72222	n/a	239	1.1	48.56	51.4816	44.1455	-24.8789	18.5504
357	1903	E. H. Thompson	Litchfield, Connecticut	Y	YU#025457	1903-04-25	294.8	-6.8	41.7409	-73.1895	1409.95	7.72222	n/a	313	1.36	46.33	39.7273	34.0662	-23.1302	16.7169
358	1905	O W Knight	Orono, Maine	Y	YU#025483	1905-05-10	296.9	-6.71	44.8787	-68.6876	798.883	5.5556	n/a	38	1.2	45.48	44.1983	37.9	-24.3504	18.0806
359	1909	H S Clark	Wethersfield, Connecticut	Y	CBS#02594	1909-06-06	299.2	-6.54	41.7023	-72.6699	1049.02	9.77778	n/a	32	1.53	47.93	36.5327	31.3268	-24.7098	18.6302
360	1909	C H Bissell	Wethersfield, Connecticut	Y	YU#025498	1909-09-11	299.2	-6.54	41.7023	-72.6699	1049.02	9.77778	n/a	32	1.53	48.38	36.8757	31.6209	-24.0577	17.9496
361	1909	E B Harger	New Milford, Connecticut	Y	#5565	1909-06-17	299.2	-6.54	41.596	-73.4154	1272.79	9.27778	n/a	70	n/a	n/a	n/a	n/a	-25.5837	19.5437
362	1915	H C Bigelow	Berlin, Connecticut	Y	#007	1915-11-14	300.5	-6.86	41.6255	-72.7534	990.854	8	n/a	14	0.91	48.47	62.1152	53.2637	-26.8878	20.5812
363	1917	Harold St. John and George E. Nichols	St. John Pond Township, Maine	Y	#2103	1917-07-10	302.1	-6.8	46.4738	-69.9039	1125.73	1.444	n/a	476	1	46.24	53.9242	46.24	-24.9377	18.6015
364	1920	H Castle	Ithaca, New York	Y	#025489	1920-08-01	303.4	-6.9	42.4422	-76.4975	944.118	7.1667	n/a	124	1.77	46.68	30.7556	26.3729	-23.2791	16.7695
365	1932	K P Jansson	New London, Connecticut	Y	#13	1932-08-05	307.3	-6.74	41.3619	-72.1041	1304.04	11	n/a	43	2.28	49.33	25.2315	21.636	-24.4182	18.1207
366	1958	John Ebinger	New Haven, Connecticut	Y	#286	1958-06-24	315.2	-6.9	41.3143	-72.9308	1461.26	8.72222	n/a	17	0.86	47.3	64.14	55	-25.3576	18.9378
367	1982	David D Taylor, Jerome Waller, Ellen Ballard, Cindy Schwind	Madison, Kentucky	Y	#1815	1982-07-14	339.15	-7.51	37.7085	-84.2723	1332.99	10	n/a	313	1.7	46.83	32.1249	27.5471	-25.5261	18.488
368	1984	Leslie J Merhhoff	Canaan, Connecticut	Y	#9536	1984-03-16	341.7	-7.65	41.9663	-73.3124	1313.18	10.5556	n/a	239	1.07	46.65	50.8433	43.5981	-25.9115	18.7473
399	1830	Douglass Houghton	Trenton Falls, New York	MICH	MICH #1491325	July 1830	283.9	-6.53	43.2565	-75.1927	968.33	6.8	27.4	247	n/a	n/a	n/a	n/a	-24.8985	18.8375
401	1901	Bronson Barlow	Marquette County, Michigan	MICH	MICH #1491320	1901-08-23	296.2	-6.79	46.5536	-87.4163	735.33	10.9444	24.6	228	1.28	50.34	45.8637	39.3281	-22.6777	16.2563
402	1911	H E Sargent	Torch Lake, Antrim County Michigan	MICH	MICH #1244466	1911-07-15	299.5	-6.69	44.9159	-85.2783	788.162	7.83333	28.9	214	1.11	47.54	49.9462	42.8288	-24.1407	17.8824
403	1838	John Wright & George H Bull	St. Clair River, Lake Huron, Michigan	MICH	#42	June 4, 1838	283.9	-6.62	43.0081	-82.425	675.71	6.9	27	180	1.13	46.99	48.4946	41.5841	-24.2235	18.0405
404	1957	Voss		MICH	S.N.	1957-08-20	314.7	-6.89							0.85	48.95	67.1583	57.5882	-22.7059	16.1834
407	2017	R. Stein	Ann Arbor, MI, 4th Ave	Ann Arbor	407	2017-03-09	407.18	-8.57	42.2765	-83.7477	848.65	9.4	30	258	0.77	45.31	68.6229	58.8442	-25.5271	17.4013
408	2017	R. Stein	Ann Arbor, MI, 4th Ave	Ann Arbor	408	2017-03-09	407.18	-8.57	42.2755	-83.7478	848.65	9.4	30	256	0.66	46.26	81.7387	70.0909	-26.2186	18.1238
409	1843	Cooley	Michigan	MSC	#19-15	1843	287.4	-6.54							0.37	49.87	157.182	134.784	-24.0442	17.9354
410	1865	Beal	Cambridge, Massachusetts	MSC	S.N.	5/24/1865	286.3	-6.54	42.3706	-71.1151	1156.87	9.3	27	4	0.69	49.95	84.4214	72.3913	-24.3195	18.2227
411	1888	AA Farwell	Keweenaw Co. Michigan	MSC	S.N.	June 1888	290.63	-6.55	47.3918	-88.0313	646.88	4.9	21.9	274	0.56	49.03	102.103	87.5536	-24.7477	18.6594
412	1892	John K Small	Hungry's Mother Creek, Four Miles North of Marion Smyth County	MSC	S.N.	6/1/1892	294	-6.43	36.8868	-81.5204	973.66	10.5	28.7	694	0.8	45.75	66.691	57.1875	-23.9266	17.9255
413	1892	John K Small	Smyth County, Virginia	MSC	S.N.	6/8/1892	294	-6.66	36.8868	-81.5204	973.66	10.5	28.7	694	0.31	44.92	168.983	144.903	-26.3053	20.1761
414	1894	H. C. Skeels	Agricultural College, MSC, East Lansing, Michigan	MSC	S.N.	10/7/1894	295.1	-6.66	42.7499	-84.4916	660.146	7.55556	29.1	260	0.51	49.86	114.011	97.7647	-24.1477	17.9204
415	1899	Unknown	Grayling, Crawford County, Michigan	MSC	S.N.	5/27/1899	295.8	-6.6	44.657	-84.7059	707.898	5.55556	28.4	347	0.2	45.26	263.907	226.3	-24.9637	18.8339
416	1900	CFW	Crystal Lake, Montcalm County, Michigan	MSC	#141922	1900-06-25	295.9	-6.77	44.6882	-86.1684	796.036	7.88889	28.4	229	0.67	46.87	81.5805	69.9552	-24.3819	18.052
417	1904	Pepoon	Cass County, Michigan	MSC	#75	1904-08-01	297	-6.78	41.9254	-85.9876	846.328	7.94444	27.5	277	0.77	44.11	66.8055	57.2857	-25.9817	19.7139
423	2017	R. Stein	3050 Kensington Road, Cleveland Ohio	Cleveland	423	2017-03-26	407.18	-8.57	41.4976	-81.5704	1123.69	10.3	29.3	281	0.63	45.88	84.9276	72.8254	-24.4445	16.2723
611	2017	R. Stein	Shanghai Botanical Garden	SG	611	2017-07-14	405.13	-8.5	31.1495	121.435	1176.87	15.9747	27.918	6	n/a	n/a	n/a	n/a	-28.3133	20.3907
